# Supplementary material for: Screening of potential IL-tolerant cellulases and their efficient saccharification of IL-pretreated lignocelluloses
Source: Royal Society of Chemistry journal article supplement (doi:10.1039/c8ra05729j), 2018-01-01
Supplement: c8ra05729j1.pdf [file c8ra05729j1.pdf]

Effects of pH, inoculation size, temperature and incubation time on the cellulase production

| pH   | FPase |      |      | CMCase |      |      | β-glucosidase |      |      |
|------|-------|------|------|--------|------|------|---------------|------|------|
| 3.0  | 0.11  | 0.11 | 0.13 | 0.23   | 0.28 | 0.24 | 1.18          | 1.21 | 1.22 |
| 4.0  | 0.16  | 0.13 | 0.14 | 0.22   | 0.27 | 0.28 | 1.36          | 1.34 | 1.28 |
| 5.0  | 0.14  | 0.15 | 0.16 | 0.22   | 0.22 | 0.19 | 0.92          | 0.96 | 0.94 |
| 6.0  | 0.13  | 0.10 | 0.14 | 0.21   | 0.22 | 0.22 | 0.64          | 0.62 | 0.62 |
| 7.0  | 0.10  | 0.11 | 0.12 | 0.19   | 0.21 | 0.21 | 0.49          | 0.45 | 0.48 |
| 8.0  | 0.17  | 0.14 | 0.14 | 0.20   | 0.17 | 0.19 | 0.45          | 0.44 | 0.48 |
| 9.0  | 0.13  | 0.14 | 0.16 | 0.15   | 0.15 | 0.16 | 0.43          | 0.41 | 0.48 |
| 10.0 | 0.13  | 0.11 | 0.11 | 0.16   | 0.17 | 0.18 | 0.41          | 0.41 | 0.45 |
| 11.0 | 0.10  | 0.12 | 0.10 | 0.16   | 0.16 | 0.15 | 0.36          | 0.37 | 0.38 |

| Inoculation size (%) | FPase |      |      | CMCase |      |      | β-glucosidase |      |      |
|----------------------|-------|------|------|--------|------|------|---------------|------|------|
| 1                    | 0.15  | 0.16 | 0.14 | 0.26   | 0.27 | 0.28 | 0.88          | 0.91 | 0.90 |
| 2                    | 0.14  | 0.14 | 0.15 | 0.41   | 0.42 | 0.48 | 1.28          | 1.23 | 1.35 |
| 3                    | 0.11  | 0.11 | 0.13 | 0.29   | 0.25 | 0.27 | 0.94          | 0.89 | 0.88 |
| 4                    | 0.11  | 0.13 | 0.12 | 0.21   | 0.24 | 0.25 | 0.85          | 1.03 | 0.99 |
| 5                    | 0.11  | 0.13 | 0.10 | 0.25   | 0.23 | 0.26 | 0.99          | 0.82 | 0.98 |

| Temperature (°C) | FPase |      |      | CMCase |      |      | β-glucosidase |      |      |
|------------------|-------|------|------|--------|------|------|---------------|------|------|
| 20               | 0.09  | 0.09 | 0.11 | 0.22   | 0.21 | 0.23 | 0.27          | 0.25 | 0.25 |
| 25               | 0.16  | 0.14 | 0.17 | 0.40   | 0.30 | 0.35 | 0.64          | 0.60 | 0.65 |
| 30               | 0.14  | 0.14 | 0.15 | 0.40   | 0.42 | 0.47 | 1.17          | 1.22 | 1.31 |
| 35               | 0.08  | 0.05 | 0.04 | 0.19   | 0.16 | 0.15 | 1.09          | 1.01 | 1.01 |
| 40               | 0.07  | 0.08 | 0.06 | 0.18   | 0.19 | 0.18 | 0.69          | 0.70 | 0.66 |

| incubation time (d) | FPase |      |      | CMCase |      |      | β-glucosidase |      |      |
|---------------------|-------|------|------|--------|------|------|---------------|------|------|
| 2                   | 0.04  | 0.08 | 0.08 | 0.40   | 0.39 | 0.43 | 0.06          | 0.05 | 0.07 |
| 3                   | 0.18  | 0.13 | 0.11 | 0.65   | 0.52 | 0.66 | 0.50          | 0.47 | 0.51 |
| 4                   | 0.15  | 0.11 | 0.13 | 0.64   | 0.50 | 0.62 | 1.01          | 0.92 | 1.00 |
| 5                   | 0.11  | 0.12 | 0.13 | 0.51   | 0.44 | 0.46 | 1.28          | 1.25 | 1.35 |
| 6                   | 0.13  | 0.11 | 0.11 | 0.39   | 0.43 | 0.49 | 1.20          | 1.26 | 1.36 |
| 7                   | 0.14  | 0.10 | 0.13 | 0.40   | 0.40 | 0.48 | 1.44          | 1.11 | 1.26 |
| 8                   | 0.17  | 0.21 | 0.20 | 0.66   | 0.59 | 0.63 | 1.49          | 1.53 | 1.62 |
| 9                   | 0.08  | 0.09 | 0.10 | 0.40   | 0.39 | 0.47 | 1.42          | 1.40 | 1.47 |
| 10                  | 0.10  | 0.10 | 0.11 | 0.41   | 0.49 | 0.48 | 1.41          | 1.35 | 1.37 |
